# Supplementary material for: SARS-CoV-2 Droplet and Airborne Transmission Heterogeneity
Source: MDPI journal article supplement (doi:10.3390/jcm11092607), 2022-05-06
Supplement: s1 [file s1]

# SARS-CoV-2 droplet and airborne transmission heterogeneity

Marta Baselga<sup>1</sup>, Antonio Güemes<sup>1,2</sup>, Juan José Alba<sup>1,3</sup>, Alberto J. Schuhmacher<sup>1,4\*</sup>

<sup>1</sup> Institute for Health Research Aragon (IIS Aragón), 50009 Zaragoza, Spain

<sup>2</sup> Department of Surgery, University of Zaragoza, 50009 Zaragoza, Spain

<sup>3</sup> Department of Infectious Diseases, Hospital Clínico Universitario Lozano Blesa, 50009 Zaragoza, Spain

<sup>4</sup> Fundación Agencia Aragonesa para la Investigación y el Desarrollo (ARAID), 50018 Zaragoza, Spain

\* Correspondence: ajimenez@iisaragon.es

## Supplementary Materials

**Table S1.** Partial sequencing of the viral genome from aerosol-subgroup patients. These sequences were compared with the reference sequences of the main VOCs using Clustal Omega software (RRID: SCR\_001591). All samples Variant of Concern Omicron BA.1 (OL672836). Patient 1's sequence also present a silent mutation 21953 C>G

|                  |                                                                                                                                                                                                                                                                                                                                                                                                                                                                                                                                                                                                                                                                                                                                                                                                                        |
|------------------|------------------------------------------------------------------------------------------------------------------------------------------------------------------------------------------------------------------------------------------------------------------------------------------------------------------------------------------------------------------------------------------------------------------------------------------------------------------------------------------------------------------------------------------------------------------------------------------------------------------------------------------------------------------------------------------------------------------------------------------------------------------------------------------------------------------------|
| <b>Patient 1</b> | GTCTCTAGTCAGTGTGTTAATCTTACAACCAGAACTCAATTACCCCCTGCATACAC<br>TAATTCCTTTCACACGTGGTGTGTTATTACCTGACAAAGTTTTCAGATCCTCAGTTT-<br>TACATTCAGTCAAGGACTTGTCTTACCTTTCTTTTCCAATGTTACTTGGTTCCATGT-<br>TATCTCTGGGACCAATGGTACTAAGAGGTTTGATAACCCTGTCCTACCATT-<br>TAATGATGGTGTGTTATTTTGCTTCCATTGAGAAGTCTAACATAATAAGAGGCTGGATTTTT-<br>GGTACTACTTTAGATTTCGAAGACCCAGTCCCTACTTATTGTTAATAACGCTACTAATGTT-<br>GTTATTAAAGTCTGTGAATTTCAATTTTGTAATGATCCATTTTGGACCACAAAAACAA-<br>CAAAAGTTGGATGGAAAGTGAGTTCAGAGTTTATTCTAGTGCGAATAATTGCACCTTT-<br>GAATATGTCTCTCAGCCTTTTCTTATGGACCTTGAAGGAAAACAGGGTAATTTCAA-<br>AAATCTTAGGGAATTTGTGTTAAGAATATTGATGGTTATTTTAAAATATATTCTAAGCA-<br>CACGCCTATTATAGTGCCTGAGCCAGAAGATCTCCCTCAGGGTTTTTCGGCTTTAGAAC-<br>CATTGGTAGATTTGCCAATAGGTATTAACATCACTAGGTTTCAAACCTTACTTGCTTTACA-<br>TAGAAGTTATTTGACTCCTGGTGATTCTTCTTCAGG |
| <b>Patient 2</b> | CTCTAGTCAGTGTGTTAATCTTACAACCAGAACTCAATTACCCCCTGCATACAC-<br>TAATTCCTTTCACACGTGGTGTGTTATTACCTGACAAAGTTTTCAGATCCTCAGTTT-<br>TACATTCAGTCAAGGACTTGTCTTACCTTTCTTTTCCAATGTTACTTGGTTCCATGT-<br>TATCTCTGGGACCAATGGTACTAAGAGGTTTGATAACCCTGTCCTACCATT-<br>TAATGATGGTGTGTTATTTTGCTTCCATTGAGAAGTCTAACATAATAAGAGGCTGGATTTTT-<br>GGTACTACTTTAGATTTCGAAGACCCAGTCCCTACTTATTGTTAATAACGCTACTAATGTT-<br>GTTATTAAAGTCTGTGAATTTCAATTTTGTAATGATCCATTTTGGACCACAAAAACAA-<br>CAAAAGTTGGATGGAAAGTGAGTTTAGAGTTTATTCTAGTGCGAATAATTGCACCTTT-<br>GAATATGTCTCTCAGCCTTTTCTTATGGACCTTGAAGGAAAACAGGGTAATTTCAA-<br>AAATCTTAGGGAATTTGTGTTAAGAATATTGATGGTTATTTTAAAATATATTCTAAGCA-<br>CACGCCTATTATAGTGCCTGAGCCAGAAGATCTCCCTCAGGGTTTTTCGGCTTTAGAAC-<br>CATTGGTAGATTTGCCAATAGGTATTAACATCACTAGGTTTCAAACCTTACTTGCTTTACA-<br>TAGAAGTTATTTGACTCCTGGTGATTCTTCTTCAG   |
| <b>Patient 3</b> | TCTAGTCAGTGTGTTAATCTTACAACCAGAACTCAATTACCCCCTGCATACACTAA<br>TTCTTTCACACGTGGTGTGTTATTACCTGACAAAGTTTTCAGATCCTCAGTTTACATT-<br>CAACTCAGGACTTGTCTTACCTTTCTTTTCCAATGTTACTTGGTTCCATGTTATCTCTGG-<br>GACCAATGGTACTAAGAGGTTTGATAACCCTGTCCTACCATTAAATGATGGTGTGTTATTTT-<br>GCTTCCATTGAGAAGTCTAACATAATAAGAGGCTGGATTTTTGGTACTACTTTA-<br>GATTTCGAAGACCCAGTCCCTACTTATTGTTAATAACGCTACTAATGTTGTTAT-<br>TAAAGTCTGTGAATTTCAATTTTGTAATGATCCATTTTGGACCACAAAAACAACAA-                                                                                                                                                                                                                                                                                                                                                                         |

|                   |                                                                                                                                                                                                                                                                                                                                                                                                                                                                                                                                                                                                                                                                                                                                                                   |
|-------------------|-------------------------------------------------------------------------------------------------------------------------------------------------------------------------------------------------------------------------------------------------------------------------------------------------------------------------------------------------------------------------------------------------------------------------------------------------------------------------------------------------------------------------------------------------------------------------------------------------------------------------------------------------------------------------------------------------------------------------------------------------------------------|
|                   | AAGTTGGATGGAAAGTGAGTTCAGAGTTTATTCTAGTGCGAATAATTGCACCTTTGAATA-TGTCTCTCAGCCTTTTCTTATGGACCTTGAAGGAAAACAGGGTAATTTCAAAAATCT-TAGGGAATTTGTGTTTAAAGAATATTGATGGTTATTTTAAAATATATTCTAAGCACACGCC-TATTATAGTGCGTGAGCCAGAAGATCTCCCTCAGGGTTTTTCGGCTTTAGAACCATTGGTA-GATTTGCCAATAGGTATTAACATCACTAGGTTTCAAACCTTTACTTGCTTTACATAGAAGT-TATTTGACTCCTGGTGATTCTTCTTCAG                                                                                                                                                                                                                                                                                                                                                                                                                     |
| <b>Patient 4</b>  | ATCTTACAACCAGAACTCAATTACCCCTGCATACACTAATTCTTTACACGTGG TGTT-TATTACCCTGACAAAGTTTTCAGATCCTCAGTTTTACATTCAACTCAGGACTTGTCTTA CTTTTCTTTTCCAATGTTACTTGGTTCATGTTATCTCTGGGACCAATGGTACTAAGA-GGTTTGATAACCCTGTCCTACCATTTAATGATGGTGTTTATTTTGCTTCCATTGAGAA-GTCTAACATAATAAGAGGCTGGATTTTTGGTACTACTTTAGATTCTGAAGACCCA-GTCCCTACTTATTGTTAATAACGCTACTAATGTTGTTATTAAAGTCTGTGAATTTCAA-TTTTGTAATGATCCATTTTGGACCACAAAAACAACAAAAGTTGGATGGAAAGTGAGTT-CAGAGTTTATTCTAGTGCGAATAATTGCACCTTTGAATATGTCTCTCAGCCTTTTCTTATG-GACCTTGAAGGAAAACAGGGTAATTTCAAAAATCTTAGGGAATTTGTGTTAAGAATATT-GATGGTTATTTTAAAATATATTCTAAGCACACGCCTATTATAGTGCGTGAGCCAGAA-GATCTCCCTCAGGGTTTTTCGGCTTTAGAACCATTGGTAGATTGGCCAATAGGTATTAACA-TCACTAGGTTTCAAACCTTTACTTGCTTTACATAGAAGTTATTT-GACTCCTGGTGATTCTTCTTCAGG                 |
| <b>Patient 5</b>  | TAGTCAGTGTGTTAATCTTACAACCAGAACTCAATTACCCCTGCATACACTAATTCTTT-CACACGTGGTGTTTATTACCCTGACAAAGTTTTCAGATCCTCAGTTTTACATTCAA CTCA-GGACTTGTTCTTACCTTTCTTTTCCAATGTTACTTGGTTCCATGTTATCTCTGGGACCAA-TGGTACTAAGAGGTTTGATAACCCTGTCCTACCATTTAATGATGGTGTTTATTTTGCTTC-CATTGAGAAGTCTAACATAATAAGAGGCTGGATTTTTGGTACTACTTTAGATTCTGAAGAC-CCAGTCCCTACTTATTGTTAATAACGCTACTAATGTTGTTATTAAAGTCTGTGAATTTCAA-TTTTGTAATGATCCATTTTGGACCACAAAAACAACAAAAGTTGGATGGAAAGTGAGTT-CAGAGTTTATTCTAGTGCGAATAATTGCACCTTTGAATATGTCTCTCAGCCTTTTCTTATG-GACCTTGAAGGAAAACAGGGTAATTTCAAAAATCTTAGGGAATTTGTGTTAAGAATATT-GATGGTTATTTTAAAATATATTCTAAGCACACGCCTATTATAGTGCGTGAGCCAGAA-GATCTCCCTCAGGGTTTTTCGGCTTTAGAACCATTGGTAGATTGGCCAATAGGTATTAACA-TCACTAGGTTTCAAACCTTTACTTGCTTTACATAGAAGTTATTT-GACTCCTGGTGATTCTTCTTCAG |
| <b>Patient 20</b> | GTCTCTAGTCAGTGTGTTAATCTTACAACCAGAACTCAATTACCCCTGCATAC AC-TAATCTTTACACGTGGTGTTTATTACCCTGACAAAGTTTTCAGATCCTCAGTTT-TACATTCAACTCAGGACTTGTCTTACCTTTCTTTTCCAATGTTACTTGGTTCCATGT-TATCTCTGGGACCAATGGTACTAAGAGGTTTGATAACCCTGTCCTACCATT-TAATGATGGTGTTTATTTTGCTTCCATTGAGAAGTCTAACATAATAAGAGGCTGGATTTTT-GGTACTACTTTAGATTCTGAAGACCCAGTCCCTACTTATTGTTAATAACGCTACTAATGTT-GTTATTAAAGTCTGTGAATTTCAATTTTGTAATGATCCATTTTGGACCACAAAAACAA-CAAAAGTTGGATGGAAAGTGAGTTCAGAGTTTATTCTAGTGCGAATAATTGCACCTTT-GAATATGTCTCTCAGCCTTTTCTTATGGACCTTGAAGGAAAACAGGGTAATTTCAA-AAATCTTAGGGAATTTGTGTTAAGAATATTGATGGTTATTTTAAAATATATTCTAAGCA-CACGCCTATTATAGTGCGTGAGCCAGAAGATCTCCCTCAGGGTTTTTCGGCTTTAGAAC-CATTGGTAGATTGGCCAATAGGTATTAACATCACTAGGTTTCAAACCTTTACTTGCTTTACA-TAGAAGTTATTTGACTCCTGGTGATTCTTCTTC |
| <b>Patient 21</b> | CTAGTCAGTGTGTTAATCTTACAACCAGAACTCAATTACCCCTGCATACACTAAT TCTTTACACGTGGTGTTTATTACCCTGACAAAGTTTTCAGATCCTCAGTTTACATTCAA-CTCAGGACTTGTCTTACCTTTCTTTTCCAATGTTACTTGGTTCCATGTTATCTCTGGGAC-CAATGGTACTAAGAGGTTTGATAACCCTGTCCTACCATTTAATGATGGTGTTTATTTT-GCTTCCATTGAGAAGTCTAACATAATAAGAGGCTGGATTTTTGGTACTACTTTA-GATTCTGAAGACCCAGTCCCTACTTATTGTTAATAACGCTACTAATGTTGTTAT-TAAAGTCTGTGAATTTCAATTTTGTAATGATCCATTTTGGACCACAAAAACAACAA-AAGTTGGATGGAAAGTGAGTTCAGAGTTTATTCTAGTGCGAATAATTGCACCTTTGAATA-TGTCTCTCAGCCTTTTCTTATGGACCTTGAAGGAAAACAGGGTAATTTCAAAAATCT-TAGGGAATTTGTGTTTAAAGAATATTGATGGTTATTTTAAAATATATTCTAAGCACACGCC-TATTATAGTGCGTGAGCCAGAAGATCTCCCTCAGGGTTTTTCGGCTTTAGAACCATTGGTA-                                                                                            |

|                   |                                                                                                                                                                                                                                                                                                                                                                                                                                                                                                                                                                                                                                                                                                                                                                                                                 |
|-------------------|-----------------------------------------------------------------------------------------------------------------------------------------------------------------------------------------------------------------------------------------------------------------------------------------------------------------------------------------------------------------------------------------------------------------------------------------------------------------------------------------------------------------------------------------------------------------------------------------------------------------------------------------------------------------------------------------------------------------------------------------------------------------------------------------------------------------|
|                   | GATTTGCCAATAGGTATTAACATCACTAGGTTTCAAACCTTTACTTGCTTTACATAGAAGT-TATTTGACTCCTGGTGATTCTTCTTCAGGT                                                                                                                                                                                                                                                                                                                                                                                                                                                                                                                                                                                                                                                                                                                    |
| <b>Patient 22</b> | TCTAGTCAGTGTGTTAATCTTACAACCAGAACTCAATTACCCCTGCATACACTAA<br>TTCTTTACACGTGGTGTATTATTACCCTGACAAAGTTTTCAGATCCTCAGTTTACATT-<br>CAACTCAGGACTTGTCTTACCTTTCTTTTCCAATGTTACTTGGTTCCATGTTATCTCTGG-<br>GACCAATGGTACTAAGAGGTTTGATAACCCTGTCCTACCATTTAATGATGGTGTATTTT-<br>GCTTCCATTGAGAAGTCTAACATAATAAGAGGCTGGATTTTGGTACTACTTTA-<br>GATTTCGAAGACCCAGTCCCTACTTATTGTTAATAACGCTACTAATGTTGTTAT-<br>TAAAGTCTGTGAATTTCAATTTTGTAAATGATCCATTTTGGACCACAAAAACAACAA-<br>AAGTTGGATGGAAAGTGAGTTCAGAGTTTATTCTAGTGCGAATAATTGCACTTTGAATA-<br>TGTCTCTCAGCCTTTTCTTATGGACCTTGAAGGAAAAACAGGGTAATTTCAAAAATCT-<br>TAGGGAATTTGTGTTAAGAATATTGATGGTTATTTTAAAAATATATTCTAAGCACACGCC-<br>TATTATAGTGCGTGAGCCAGAAGATCTCCCTCAGGGTTTTTCGGCTTTAGAACCATTGGTA-<br>GATTTGCCAATAGGTATTAACATCACTAGGTTTCAAACCTTTACTTGCTTTACATAGAAGT-<br>TATTTGACTCCTGGTGATTCTTCTTCAGG |

**Table S2.** Viral load detected in aerosols per m<sup>3</sup> of air using different methods.

| <i>Method</i>                                                                                           | <i>Viral load (copies/m<sup>3</sup>) by RT-qPCR</i>                                                   | <i>Patients</i>                                                         | <i>Particle diameter</i>                                                  | <i>Ref.</i> |
|---------------------------------------------------------------------------------------------------------|-------------------------------------------------------------------------------------------------------|-------------------------------------------------------------------------|---------------------------------------------------------------------------|-------------|
| NIOSH BC 251 Cyclon<br>Time: 4 hours<br>Flow: 3.5 L/min<br>Volume: 5040 L<br>Medium: 15 mL (n/d)        | 1.84 E <sup>3</sup> - 3.38 E <sup>3</sup><br><br>Detection:<br>2/3 samples                            | 2 patients (Ct 33.22;<br>18.45 and 20.11)                               | >4 µm<br>1–4 µm<br>(Not detected in <1 µm samples)                        | [1]         |
| SASS 2300 Wetted Wall Cyclone<br>Time: 30 min<br>Flow: 300 L/min<br>Volume: 9000 L<br>Medium: n/d (n/d) | 5.2 E <sup>2</sup> - 1.4 E <sup>3</sup><br><br>Detection:<br>UCI: 54/124 samples<br>GW: 9/114 samples | ICU 15 pat.<br>GW 24 pat.                                               | n/d                                                                       | [2]         |
| Sartorius MD8<br>Time: 15 min<br>Flow: 50 L/min<br>Volume: 750 L<br>Medium: gelatin filter              | 2.42 E <sup>3</sup><br><br>Detection:<br>121/163 samples                                              | 3 patients and<br>quarantin unit spaces                                 | n/d                                                                       | [3]         |
| Coriolis µ<br>Time: 10 min<br>Flow: 100 L/min<br>Volume: 1000 L<br>Medium: 5 mL (DMEM)                  | 5.05 E <sup>2</sup> – 5.15 E <sup>2</sup><br><br>Detection:<br>14/31 samples                          | Tracheostomy<br>procedures,<br>admissions ward, ICU<br>and general area | n/d                                                                       | [4]         |
| VIVAS (condensation method)<br>Time: 1 hour<br>Flow: 6.5 L/min<br>Volume: 390 L<br>Medium: 1.5 mL (PBS) | 8.7 E <sup>3</sup><br><br>Detection:<br>1/2 samples                                                   | Respiratory infection<br>evaluation area                                | n/d                                                                       | [5]         |
| SKC biosampler<br>Time: 3 hours<br>Flow: 12 L/min<br>Volume: 2160 L<br>Medium: 15 mL (DMEM)             | n/d<br><br>Detection:<br>2/14 samples, only in<br>ICU areas                                           | ICU areas (10<br>patients), hospital<br>entrance and hall               | 0.25 and 32 µm<br>particle size<br>detection with<br>aerosol spectrometer | [6]         |
| Cascade impactor<br>Time: 48 hours<br>Flow: 5 L/min<br>Volume: 14400 L                                  | 5 - 5.1 E <sup>1</sup><br><br>Detection:<br>9/90 samples                                              | COVID areas, close to<br>ICU, nursing and<br>workers workstations       | ≤ 2.5 µm,<br>2.5-10.0 µm and<br>> 10 µm                                   | [7]         |
| NIOSH W-15 cyclone<br>Time: 30 min<br>Flow: 3.5 L/min<br>Volume: 210 L                                  | n/d                                                                                                   | ICU and isolation<br>ward                                               | n/d                                                                       | [8]         |

|                                                                                                                                                                                                         |                                                                                                                                         |                                                                                                          |     |      |
|---------------------------------------------------------------------------------------------------------------------------------------------------------------------------------------------------------|-----------------------------------------------------------------------------------------------------------------------------------------|----------------------------------------------------------------------------------------------------------|-----|------|
| <p>Medium: 15 mL (&gt;4.0 µm),<br/>1.5 mL (1.0-4.0 µm) and<br/>PTFE filter (&lt;1.0 µm)</p> <p>DingBlue sampler<br/>Time: 30 min<br/>Flow: 14 L/min<br/>Volume: 420 L<br/>Medium: 3 mL (VTM)</p>        | <p>Detection:<br/>UCI: 1/218 samples<br/>IW: 9/182</p>                                                                                  |                                                                                                          |     |      |
| <p>Coriolis µ<br/>Time: 10 min<br/>Flow: 300 L/min<br/>Volume: 3000 L<br/>Medium: 15 mL (PBS)</p> <p>Sartorius MD8<br/>Time: 10 min<br/>Flow: 50 L/min<br/>Volume: 500 L<br/>Medium: gelatin filter</p> | <p>&lt;10 – 4.6 E<sup>2</sup></p> <p>Detection:<br/>4/55 samples</p>                                                                    | ICU and non-ICU<br>COVID settings                                                                        | n/d | [9]  |
| <p>Coriolis µ<br/>Time: 10 min<br/>Flow: 100 L/min<br/>Volume: 1000 L<br/>Medium: 4 mL (PBS)</p>                                                                                                        | <p>6.36 E<sup>3</sup> – 6.66 E<sup>3</sup></p> <p>Detection:<br/>2/44 samples</p>                                                       | 4 COVID areas and 7<br>non-COVID areas<br>from an Hospital                                               | n/d | [10] |
| <p>Coriolis µ<br/>Time: 10 min<br/>Flow: 100 L/min<br/>Volume: 1000 L<br/>Medium: 5 mL (DMEM)</p>                                                                                                       | <p>1.31 E<sup>2</sup> – 7.05 E<sup>3</sup></p> <p>Detection:<br/>2/31 samples</p>                                                       | Emergency<br>Department and<br>hospital public areas                                                     | n/d | [11] |
| <p>Coriolis µ<br/>Time: 10 min<br/>Flow: 150 L/min<br/>Volume: 1500 L<br/>Medium: 5 mL (VTM)</p>                                                                                                        | <p>0.64 E<sup>2</sup> – 11.94 E<sup>3</sup></p> <p>Detection:<br/>ICU: 4/23 samples<br/>WR: 7/92 samples<br/>LTCR: 3/15<br/>FR: 1/8</p> | COVID rooms (WR),<br>ICU areas and rooms<br>in long-term care<br>homes (LTCT) and<br>facility rooms (FR) | n/d | [12] |
| <p>Coriolis µ<br/>Time: 10 min<br/>Flow: 300 L/min<br/>Volume: 3000 L<br/>Medium: 15 mL (PBS)</p>                                                                                                       | <p>n/d</p> <p>Detection:<br/>4/90 samples</p>                                                                                           | COVID rooms                                                                                              | n/d | [13] |
| <p>SKC biosampler impinger<br/>Time: 30 min<br/>Flow: 12.5 L/min<br/>Volume: 375 L<br/>Medium: 10 mL (PBS)</p>                                                                                          | <p>2.6 E<sup>2</sup> – 7.1 E<sup>2</sup></p> <p>Detection:<br/>16/86 samples</p>                                                        | COVID rooms and<br>other hospital areas                                                                  | n/d | [14] |
| <p>PM2.5 Filters<br/>Time: 10 hours<br/>Flow: 10 L/min<br/>Volume: 6000 L</p>                                                                                                                           | <p>9.89 E<sup>2</sup> – 9.50 E<sup>3</sup></p> <p>Detection:<br/>3/12 samples</p>                                                       | Public transport                                                                                         | n/d | [15] |
| <p>Sartorius MD8<br/>Time: 4, 6 and 18 hours<br/>Flow: 10 L/min<br/>Volume: 240, 260 and 1080<br/>L<br/>Medium: gelatin filter</p>                                                                      | <p>&lt;2.5 E<sup>1</sup> – 5.1 E<sup>2</sup></p> <p>Detection:<br/>11/100 samples</p>                                                   | COVID patient rooms                                                                                      | n/d | [16] |
| <p>WA-400 DingBlue Centrifugal<br/>Time: 30 min<br/>Flow: 400 L/min<br/>Volume: 12000 L<br/>Medium: 2 mL (PBS)</p>                                                                                      | <p>1.11 E<sup>3</sup> – 1.12 E<sup>4</sup></p> <p>Detection:<br/>ICU: 8/38 samples<br/>TAC: 1/6 samples</p>                             | ICU places and TAC<br>rooms                                                                              | n/d | [17] |
| <p>Derenda PNS 16T-3.1<br/>Time: 1.5 hours<br/>Flow: 16.7 L/min</p>                                                                                                                                     | <p>5.5 E<sup>1</sup> – 3.15 E<sup>3</sup></p> <p>Detection:</p>                                                                         | AIIR                                                                                                     | n/d | [18] |

|                                           |                 |  |  |  |
|-------------------------------------------|-----------------|--|--|--|
| Volume: 1500 L<br>Medium: membrane filter | 25/1544 samples |  |  |  |
|-------------------------------------------|-----------------|--|--|--|

Where, ICU = Intensive Care Unit; GW = General Ward; AIIR = Airborne Infectious Isolation Rooms.

**Table S3.** Some superspreading events. Modified from [19].

| Setting               | Number of sites | Total infected | Reference |
|-----------------------|-----------------|----------------|-----------|
| Religious             | 2               | 4531           | [20]      |
|                       | 3               | 150            | [21]      |
|                       | 1               | 102            | [22]      |
|                       | 2               | 33             | [23]      |
|                       | 1               | 19             | [24]      |
| Worker dormitories    | 17              | 1690           | [23]      |
| Food processing plant | 1               | 1029           | [25]      |
|                       | 3               | 779            | [26]      |
|                       | 1               | 534            | [27]      |
|                       | 4               | 469            | [28]      |
| Work                  | 2               | 34             | [23]      |
|                       | 3               | 25             | [29]      |
| School                | 1               | 133            | [30]      |
|                       | 1               | 130            | [31]      |
|                       | 1               | 96             | [32]      |
|                       | 1               | 26             | [33]      |
| Shopping              | 3               | 122            | [23]      |
|                       | 3               | 44             | [34]      |
| Hospital              | 1               | 118            | [20]      |
|                       | 1               | 54             | [35]      |
|                       | 2               | 20             | [36]      |
| Bar                   | 6               | 100            | [36]      |
|                       | 1               | 6              | [37]      |
|                       | 1               | 77             | [38]      |
|                       | 1               | 16             | [39]      |
|                       | 1               | 15             | [40]      |
|                       | 4               | 106            | [24]      |
| Building Site         | 3               | 90             | [23]      |
| Conference            | 1               | 89             | [41]      |
| Meal                  | 2               | 55             | [23]      |
|                       | 2               | 19             | [42]      |
| Aircraft              | 1               | 26             | [43]      |
| Skiing                | 1               | 11             | [44]      |
| Bus                   | 1               | 30             | [45]      |

**Table S4.** Dose-response characterization using animal models. Modified from Karimzadeh et al.[46]

| Host               | Dose (copies) | Infection rate | Inoculation method        | Ref  |
|--------------------|---------------|----------------|---------------------------|------|
| Ferret             | 221,359       | 6/6            | Intranasal                | [47] |
| Ferret             | 500           | 1/6            | Intranasal                | [48] |
|                    | 50,000        | 6/6            |                           |      |
|                    | 500,000       | 6/6            |                           |      |
| Ferret             | 420,000       | 4/4            | Intranasal                | [49] |
| Mice (hACE2)       | 70,000        | 7/19           | Intranasal                | [50] |
| Mice (hACE2)       | 400,000       | 3/3            | Intranasal                | [51] |
|                    | 4,000,000     | 1/3            | Intragastric              |      |
| Mice (hACE2)       | 630           | 2/2            | Aerosols                  | [52] |
| Mice (hACE2)       | 21,000        | 24/24          | Intranasal                | [53] |
| Mice (hACE2)       | 100,000       | 11             | Intranasal                | [54] |
| Cynomolgus macaque | 700,000       | 4/4            | Intranasal, intratraqueal | [55] |

|                       |           |       |                                            |      |
|-----------------------|-----------|-------|--------------------------------------------|------|
| Rhesus macaque        | 700,000   | 2/2   | Intraocular                                | [56] |
|                       |           | 1/1   | Intrathecal                                |      |
|                       |           | 0/2   | Intragastric                               |      |
| Rhesus macaque        | 1,820,000 | 8/8   | Intranasal, intrathecal, intraocular, oral | [57] |
| Rhesus macaque        | 11,000    | 3/3   | Intranasal, intrathecal                    | [58] |
|                       | 110,000   | 3/3   | Intranasal, intrathecal                    |      |
|                       | 1,100,000 | 3/3   | Intranasal, intrathecal                    |      |
| Cynomolgus macaque    | 48,600    | 4/4   | Aerosols                                   | [59] |
| Rhesus macaque        | 28,700    | 4/4   |                                            |      |
| African Green Monkeys | 38,000    | 3/3   |                                            |      |
| African Green Monkeys | 500,000   | 6/6   | Intranasal, intrathecal                    | [60] |
| African Green Monkeys | 3,000,000 | 6/6   | Intranasal                                 | [61] |
| African Green Monkeys | 2,000     | 2/2   | Aerosols                                   | [62] |
|                       | 3,610,000 | 2/2   | Intranasal, intrathecal intraocular, oral  |      |
| Syrian hamster        | 398,107   | 4/4   | Intranasal, intraocular                    | [63] |
|                       | 1,000     |       | Intranasal, intraocular                    |      |
| Syrian hamster        | 56,000    | 3/3   | Intranasal                                 | [64] |
| Syrian hamster        | 100,000   | 24/36 | Intranasal                                 | [65] |
| Syrian hamster        | 70,000    | 7/9   | Intranasal                                 | [66] |

## References

- Chia, P.Y.; Coleman, K.K.; Tan, Y.K.; Ong, S.W.X.; Gum, M.; Lau, S.K.; Lim, X.F.; Lim, A.S.; Sutjipto, S.; Lee, P.H.; et al. Detection of Air and Surface Contamination by SARS-CoV-2 in Hospital Rooms of Infected Patients. *Nat. Commun.* **2020**, *11*, doi:10.1038/s41467-020-16670-2.
- CHEN, G.M.; JI, J.J.; JIANG, S.; XIAO, Y.Q.; ZHANG, R.L.; HUANG, D.N.; LIU, H.; YU, S.Y. Detecting Environmental Contamination of Acute Respiratory Syndrome Coronavirus 2 (SARS-CoV-2) in Isolation Wards and Fever Clinics\*. *Biomed. Environ. Sci.* **2020**, *33*, 943–947, doi:10.3967/bes2020.130.
- Santarpia, J.L.; Rivera, D.N.; Herrera, V.L.; Morwitzer, M.J.; Creager, H.M.; Santarpia, G.W.; Crown, K.K.; Brett-Major, D.M.; Schnaubelt, E.R.; Broadhurst, M.J.; et al. Aerosol and Surface Contamination of SARS-CoV-2 Observed in Quarantine and Isolation Care. *Sci. Rep.* **2020**, *10*, 1–8, doi:10.1038/s41598-020-69286-3.
- Zhou, A.J.; Otter, J.A.; Price, J.R.; Cimpeanu, C.; Garcia, M.; Kinross, J.; Boshier, P.R.; Mason, S.; Bolt, F.; Alison, H.; et al. Investigating SARS-CoV-2 Surface and Air Contamination in an Acute Healthcare 2 Setting during the Peak of the COVID-19 Pandemic in London. *medRxiv Prepr.* **2020**, 1–24.
- Lednický, J.; Shankar, S.; Elbadry, M.; Gibson, J.; Alam, M.; Stephenson, C.; EIGUREN, A.; Glenn, J.; Mavian, C.; Salemi, M.; et al. Collection of SARS-CoV-2 Virus from the Air of a Clinic Within a University Student Health Care Center and Analyses of the Viral Genomic Sequence. *Aerosol Air Qual. Res.* **2020**, *20*, 1167–1171, doi:10.4209/aaqr.2020.02.0202.Collection.
- Kenarkoohi, A.; Noorimotlagh, Z.; Falahi, S.; Amarloei, A.; Abbas, S. Hospital Indoor Air Quality Monitoring for the Detection of SARS-CoV-2 (COVID-19) Virus. *Sci. Total Environment* **2020**, *748*, 141324.
- Stern, R.A.; Koutrakis, P.; Martins, M.A.G.; Lemos, B.; Dowd, S.E.; Sunderland, E.M.; Garshick, E. Characterization of Hospital Airborne SARS-CoV-2. *Respir. Res.* **2021**, *22*, 1–8, doi:10.1186/s12931-021-01637-8.
- Lei, H.; Ye, F.; Liu, X.; Huang, Z.; Ling, S.; Jiang, Z.; Cheng, J.; Huang, X.; Wu, Q.; Wu, S.; et al. SARS-CoV-2 Environmental Contamination Associated with Persistently Infected COVID-19 Patients; 2020; Vol.

14; ISBN 0000000173148.

9. Moore, G.; Rickard, H.; Stevenson, D.; Aranega-Bou, P.; Pitman, J.; Crook, A.; Davies, K.; Spencer, A.; Burton, C.; Easterbrook, L.; et al. Detection of SARS-CoV-2 within the Healthcare Environment: A Multi-Centre Study Conducted during the First Wave of the COVID-19 Outbreak in England. *J. Hosp. Infect.* **2021**, *108*, 189–196, doi:10.1016/j.jhin.2020.11.024.
10. Gomes, P.; Gonçalves, J.; Isabel, A.; Lopes, B.; Esteves, N.A.; Emanuel, G.; Bamba, E.; Maria, S.; Branco, P.T.B.S.; Soares, R.R.G.; et al. Evidence of Air and Surface Contamination with SARS-CoV-2 in a Major Hospital in Portugal. **2022**.
11. Department of Infectious Disease, Imperial College London, London, UK, W. 1PG EVALUATION OF SARS-CoV-2 AIR CONTAMINATION IN HOSPITALS WITH CORIOLIS  $\mu$  AIR SAMPLER / CONTEXT / PROTOCOL / RESULTS / CUSTOMER / CONCLUSION. **2020**, 2.
12. Mallach, G.; Kasloff, S.B.; Kovesi, T.; Kumar, A.; Kulka, R.; Krishnan, J.; Robert, B.; McGuinty, M.; den Otter-Moore, S.; Yazji, B.; et al. Aerosol SARS-CoV-2 in Hospitals and Long-Term Care Homes during the COVID-19 Pandemic. *PLoS One* **2021**, *16*, 1–17, doi:10.1371/journal.pone.0258151.
13. Winslow, R.L.; Zhou, J.; Windle, E.F.; Nur, I.; Lall, R.; Ji, C.; Millar, J.E.; Dark, P.; Naisbitt, J.; Simonds, A.; et al. SARS-CoV-2 Environmental Contamination from Hospitalised COVID-19 Patients Receiving Aerosol Generating Procedures. *Thorax* **2021**, thoraxjnl-2021-218035, doi:10.1101/2021.07.04.21259945.
14. Styczynski, A.; Hemlock, C.; Hoque, K.I.; Verma, R.; LeBoa, C.; Bhuiyan, M.O.F.; Nag, A.; Harun, M.G.D.; Amin, M.B.; Andrews, J.R. Ventilation and Detection of Airborne SARS-CoV-2: Elucidating High-Risk Spaces in Naturally Ventilated Healthcare Settings. *medRxiv* **2021**, 2021.06.30.21258984.
15. Moreno, T.; Pintó, R.M.; Bosch, A.; Moreno, N.; Alastuey, A.; Minguillón, M.C.; Anfruns-Estrada, E.; Guix, S.; Fuentes, C.; Buonanno, G.; et al. Tracing Surface and Airborne SARS-CoV-2 RNA inside Public Buses and Subway Trains. *Environ. Int.* **2021**, *147*, 106326, doi:10.1016/j.envint.2020.106326.
16. Dumont-Leblond, N.; Veillette, M.; Mubareka, S.; Yip, L.; Longtin, Y.; Jouvett, P.; Paquet Bolduc, B.; Godbout, S.; Kobinger, G.; McGeer, A.; et al. Low Incidence of Airborne SARS-CoV-2 in Acute Care Hospital Rooms with Optimized Ventilation. *Emerg. Microbes Infect.* **2020**, *9*, 2597–2605, doi:10.1080/22221751.2020.1850184.
17. Hu, J.; Lei, C.; Chen, Z.; Liu, W.; Hu, X.; Pei, R.; Su, Z.; Deng, F.; Huang, Y.; Sun, X.; et al. Distribution of Airborne SARS-CoV-2 and Possible Aerosol Transmission in Wuhan Hospitals, China. *Natl. Sci. Rev.* **2020**, *7*, 1865–1867.
18. Song, Z.G.; Chen, Y.M.; Wu, F.; Xu, L.; Wang, B.F.; Shi, L.; Chen, X.; Dai, F.H.; She, J.L.; Chen, J.M.; et al. Identifying the Risk of SARS-CoV-2 Infection and Environmental Monitoring in Airborne Infectious Isolation Rooms (AIIRs). *Virol. Sin.* **2020**, *35*, 785–792, doi:10.1007/s12250-020-00301-7.
19. Majra, D.; Benson, J.; Pitts, J.; Stebbing, J. SARS-CoV-2 (COVID-19) Superspreader Events. *J. Infect.* **2021**, *82*, 36–40.
20. Shim, E.; Tariq, A.; Choi, W.; Lee, Y.; Chowell, G. Transmission Potential and Severity of COVID-19 in South Korea. *Int. J. Infect. Dis.* **2020**, *93*, 339–344, doi:10.1016/j.ijid.2020.03.031.
21. Zauzmer, J.; Washington-Post ‘Take It Very Seriously’: Pastor at Arkansas Church Where 34 People Came down with Coronavirus Sends a Warning.
22. McKie, R.; TheObserver Did Singing Together Spread Coronavirus to Four Choirs?
23. Dashboard of the COVID-19 Virus Outbreak in Singapore.
24. Adam, D.C.; Wu, P.; Wong, J.Y.; Lau, E.H.Y.; Tsang, T.K.; Cauchemez, S.; Leung, G.M.; Cowling, B.J. Clustering and Superspreading Potential of SARS-CoV-2 Infections in Hong Kong. *Nat. Med.* **2020**, *26*, 1714–1719, doi:10.1038/s41591-020-1092-0.
25. DW Coronavirus: German Slaughterhouse Outbreak Crosses.

26. Cannon, A. Eu.Desmoinesregister.Com.
27. Adebayo, B. A Worker Infected 533 Others With Coronavirus at a Factory in Ghana, President Says.
28. Halliday, J.; TheGuardian Over 450 Covid-19 Cases Reported at Food Factories in England and Wales.
29. Park, S.Y.; Kim, Y.M.; Yi, S.; Lee, S.; Na, B.J.; Kim, C.B.; Kim, J. Il; Kim, H.S.; Kim, Y.B.; Park, Y.; et al. Coronavirus Disease Outbreak in Call Center, South Korea. *Emerg. Infect. Dis.* **2020**, *26*, 1666–1670, doi:10.3201/eid2608.201274.
30. Fontanet, A.; Tondeur, L.; Madec, Y.; Grant, R.; Besombes, C.; Jolly, N.; Pellerin, S.F.; Ungeheuer, M.-N.; Cailleau, I.; Kuhmel, L.; et al. Cluster of COVID-19 in Northern France: A Retrospective Closed Cohort Study. *SSRN Electron. J.* **2020**, 1–22, doi:10.2139/ssrn.3582749.
31. S., K.-O.; N., H.; I., E. Schools in Jerusalem Shut as Dozens of Students, Staff Test Positive for the Coronavirus.
32. Ministry of Health New Zeland, N. COVID-19 - Significant Clusters.
33. MOH News Highlights.
34. Cai, J.; Sun, W.; Huang, J.; Gamber, M.; Wu, J.; He, G. Indirect Virus Transmission in Cluster of COVID-19 Cases, Wenzhou, China, 2020. *Emerg. Infect. Dis.* **2020**, *26*, 1343–1345.
35. Chu, J.; Yang, N.; Wei, Y.; Yue, H.; Zhang, F.; Zhao, J.; He, L.; Sheng, G.; Chen, P.; Li, G.; et al. Clinical Characteristics of 54 Medical Staff with COVID-19: A Retrospective Study in a Single Center in Wuhan, China. *J. Med. Virol.* **2020**, *92*, 807–813, doi:10.1002/jmv.25793.
36. Sim, W. The Straits Times; Published 2020. Japan Identifies 15 Clusters as Covid-19 Cases.
37. LeTemps «Superspreader»: 300 Visiteurs d'un Club Zurichois En Quarantaine.
38. Stuff Coronavirus: Matamata Bar Owner on NZ's Biggest Covid-19 Cluster Outbreak.
39. Aljazeera After One Infected 16 at Berlin Nightclub, Coronavirus Fears Grow.
40. CNN How an Austrian Ski Resort Helped Coronavirus Spread Across Europe.
41. Marcelo, P.; O'brien, M. Cluster of Coronavirus Cases Tied to U.S. Biotech Meeting.
42. Sonja A. Rasmussen, MD, MS, J.C.S.; John C. Smulian Sonja A. Rasmussen MD, M.S.; Zhu, X.; Ge, Y.; Wu, T.; Zhao, K.; Chen, Y.; Wu, B.; Zhu, F.; Zhu, B.; et al. Secondary Attack Rate and Superspreading Events for SARS-CoV-2. *Lancet* **2020**, *365*, e47, doi:10.1056/NEJMoa2001316.Riou.
43. Orban, A. 26 Passengers Tested Positive for Covid-19 on an Emirates Flight to Hong Kong.
44. Zeichner, L.O.; Shoham, S.; Vazquez, J.; Rebolli, A.; Betts, R. Cluster of COVID-19 in French Alps, 2020. **2014**, *2019*, 1–26.
45. Shen, Y.; Li, C.; Dong, H.; Wang, Z.; Martinez, L.; Sun, Z.; Handel, A.; Chen, Z.; Chen, E.; Ebell, M.H.; et al. Community Outbreak Investigation of SARS-CoV-2 Transmission among Bus Riders in Eastern China. *JAMA Intern. Med.* **2020**, *180*, 1665–1671, doi:10.1001/jamainternmed.2020.5225.
46. Karimzadeh, S.; Bhopal, R.; Huy, N.T. Review of Infective Dose, Routes of Transmission, and Outcome of COVID-19 Caused by the SARS-COV-2: Comparison with Other Respiratory Viruses. *Epidemiol. Infect.* **2021**, doi:10.1017/S0950268821000790.
47. Kim, Y. Il; Kim, S.G.; Kim, S.M.; Kim, E.H.; Park, S.J.; Yu, K.M.; Chang, J.H.; Kim, E.J.; Lee, S.; Casel, M.A.B.; et al. Infection and Rapid Transmission of SARS-CoV-2 in Ferrets. *Cell Host Microbe* **2020**, *27*, 704-709.e2, doi:10.1016/j.chom.2020.03.023.
48. Ryan, K.A.; Bewley, K.R.; Fotheringham, S.A.; Slack, G.S.; Brown, P.; Hall, Y.; Wand, N.I.; Marriott, A.C.; Cavell, B.E.; Tree, J.A.; et al. Dose-Dependent Response to Infection with SARS-CoV-2 in the Ferret Model and Evidence of Protective Immunity. *Nat. Commun.* **2021**, *12*, 1–13, doi:10.1038/s41467-



020-20439-y.

49. Richard, M.; Kok, A.; Meulder, D. De; Bestebroer, T.M.; Lamers, M.M.; Okba, N.M.A.; Vlisssingen, M.F. Van; Rockx, B.; Haagmans, B.L.; Marion, P.G.; et al. SARS-CoV-2 Is Transmitted via Contact and via the Air between Ferrets. *Nat. Commun.* **2020**.
50. Bao, L.; Deng, W.; Huang, B.; Gao, H.; Liu, J.; Ren, L.; Wei, Q.; Yu, P.; Xu, Y.; Qi, F.; et al. The Pathogenicity of SARS-CoV-2 in HACE2 Transgenic Mice. *Nature* **2020**, *583*, 830–833, doi:10.1038/s41586-020-2312-y.
51. Sun, S.H.; Chen, Q.; Gu, H.J.; Yang, G.; Wang, Y.X.; Huang, X.Y.; Liu, S.S.; Zhang, N.N.; Li, X.F.; Xiong, R.; et al. A Mouse Model of SARS-CoV-2 Infection and Pathogenesis. *Cell Host Microbe* **2020**, *28*, 124–133.e4, doi:10.1016/j.chom.2020.05.020.
52. Bao, L.; Gao, H.; Deng, W.; Lv, Q.; Yu, H.; Liu, M.; Yu, P.; Liu, J.; Qu, Y.; Gong, S.; et al. Transmission of Severe Acute Respiratory Syndrome Coronavirus 2 via Close Contact and Respiratory Droplets among Human Angiotensin-Converting Enzyme 2 Mice. *J. Infect. Dis.* **2020**, *222*, 551–555, doi:10.1093/infdis/jiaa281.
53. Jiang, R. Di; Liu, M.Q.; Chen, Y.; Shan, C.; Zhou, Y.W.; Shen, X.R.; Li, Q.; Zhang, L.; Zhu, Y.; Si, H.R.; et al. Pathogenesis of SARS-CoV-2 in Transgenic Mice Expressing Human Angiotensin-Converting Enzyme 2. *Cell* **2020**, *182*, 50–58.e8, doi:10.1016/j.cell.2020.05.027.
54. Dinnon, H.; Leist, S.; Schäfer, A.; Edwards, C.; Martinez, D.; Montgomery, S.; West, A.; Yount, B.; Hou, Y.; Adams, L.; et al. A Mouse-Adapted SARS-CoV-2 Model for the Evaluation of COVID-19 Medical Countermeasures. *bioRxiv Prepr.* **2020**.
55. Rockx, B.; Kuiken, T.; Herfst, S.; Bestebroer, T.; Lamers, M.M.; Munnink, B.B.O.; De Meulder, D.; Van Amerongen, G.; Van Den Brand, J.; Okba, N.M.A.; et al. Comparative Pathogenesis of COVID-19, MERS, and SARS in a Nonhuman Primate Model. *Science (80-. ).* **2020**, *368*, 1012–1015, doi:10.1126/science.abb7314.
56. Deng, W.; Bao, L.; Gao, H.; Xiang, Z.; Qu, Y.; Song, Z.; Gong, S.; Liu, J.; Liu, J.; Yu, P.; et al. Ocular Conjunctival Inoculation of SARS-CoV-2 Can Cause Mild COVID-19 in Rhesus Macaques. *Nat. Commun.* **2020**, *11*, 1–7, doi:10.1038/s41467-020-18149-6.
57. Munster, V.J.; Feldmann, F.; Williamson, B.N.; Doremalen, N. van; Pérez-Pérez, L.; Schulz, J.; Meade-White, K.; Okumura, A.; Callison, J.; Brumbaugh, B.; et al. Respiratory Disease and Virus Shedding in Rhesus Macaques Inoculated with SARS-CoV-2 1. *bioRxiv* **2020**.
58. Chandrashekar, A.; Liu, J.; Martino, A.J.; McMahan, K.; Mercad, N.B.; Peter, L.; Tostanosk, L.H.; Yu, J.; Maliga, Z.; Nekorchuk, M.; et al. SARS-CoV-2 Infection Protects against Rechallenge in Rhesus Macaques. *Science (80-. ).* **2020**, *369*, 812–817, doi:10.1126/science.abc4776.
59. Johnston, S.C.; Ricks, K.M.; Jay, A.; Raymond, J.L.; Rossi, F.; Zeng, X.; Scruggs, J.; Dyer, D.; Frick, O.; Koehler, J.W.; et al. Development of a Coronavirus Disease 2019 Nonhuman Primate Model Using Airborne Exposure. *PLoS One* **2021**, *16*, 1–22, doi:10.1371/journal.pone.0246366.
60. Woolsey, C.; Borisevich, V.; Prasad, A.N.; Agans, K.N.; Deer, D.J.; Dobias, N.S.; Heymann, J.C.; Foster, S.L.; Levine, C.B.; Medina, L.; et al. Establishment of an African Green Monkey Model for COVID-19 and Protection against Re-Infection. *Nat. Immunol.* **2021**, *22*, 86–98, doi:10.1038/s41590-020-00835-8.
61. Cross, R.W.; Agans, K.N.; Prasad, A.N.; Borisevich, V.; Woolsey, C.; Deer, D.J.; Dobias, N.S.; Geisbert, J.B.; Fenton, K.A.; Geisbert, T.W. Intranasal Exposure of African Green Monkeys to SARS-CoV-2 Results in Acute Phase Pneumonia with Shedding and Lung Injury Still Present in the Early Convalescence Phase. *Virol. J.* **2020**, *17*, 1–12, doi:10.1186/s12985-020-01396-w.
62. Blair, R.; Vaccari, M.; Doyle, L.; Roy, C.; Russell, K.; Fahlberg, M.; Monjure, C.; Beddingfield, B.; Plante, K.; Plante, K.; et al. ARDS and Cytokine Storm in SARS-CoV-2 Infected Caribbean Vervets. *bioRxiv* **2021**.

63. Imai, M.; Iwatsuki-Horimoto, K.; Hatta, M.; Loeber, S.; Halfmann, P.J.; Nakajima, N.; Watanabe, T.; Ujie, M.; Takahashi, K.; Ito, M.; et al. Syrian Hamsters as a Small Animal Model for SARS-CoV-2 Infection and Countermeasure Development. *Proc. Natl. Acad. Sci. U. S. A.* **2020**, *117*, 16587–16595, doi:10.1073/pnas.2009799117.
64. Sia, S.F.; Yan, L.M.; Chin, A.W.H.; Fung, K.; Choy, K.T.; Wong, A.Y.L.; Kaewpreedee, P.; Perera, R.A.P.M.; Poon, L.L.M.; Nicholls, J.M.; et al. Pathogenesis and Transmission of SARS-CoV-2 in Golden Hamsters. *Nature* **2020**, *583*, 834–838, doi:10.1038/s41586-020-2342-5.
65. Osterrieder, N.; Bertzbach, L.D.; Dietert, K.; Abdelgawad, A. Age-Dependent Progression of SARS-CoV-2 Infection. *Viruses* **2020**, *12*, 1–11.
66. Schlottau, K.; Rissmann, M.; Graaf, A.; Schön, J.; Sehl, J.; Wylezich, C.; Höper, D.; Mettenleiter, T.C.; Balkema-Buschmann, A.; Harder, T.; et al. SARS-CoV-2 in Fruit Bats, Ferrets, Pigs, and Chickens: An Experimental Transmission Study. *The Lancet Microbe* **2020**, *1*, e218–e225, doi:10.1016/S2666-5247(20)30089-6.
